# Supplementary material for: Finding of a new cycle route in Ni/Mo2C catalyzed CH4–CO2 reforming
Source: Royal Society of Chemistry journal article supplement (doi:10.1039/d0cy02428g), 2021-01-01
Supplement: d0cy02428g1.pdf [file d0cy02428g1.pdf]

## Supplementary Information

### 1. Experimental Section

#### 1.1 Sample preparation

The carbon nanotubes (CNTs, average outer diameter >50 nm, length 0.5-2  $\mu\text{m}$ ) used were multi-walled carbon nanotubes (purchased from Chengdu Organic Chemicals Co. Ltd.). The Ni/Mo<sub>2</sub>C/CNTs catalysts were synthesized by a simple and environmentally friendly carburization method according to our previous study.<sup>16,18</sup> This method did not require the passivation step for preparing Mo<sub>2</sub>C. The Ni/Mo<sub>2</sub>C/CNTs catalysts with different Ni/Mo molar ratios were prepared in two steps. In the first step, the precursors with theoretical loadings of 11.6 wt% Ni and a molar ratio of Ni/Mo=0.5, 1, 1.5 and 2 were prepared by two-step impregnation method with a Mo-first impregnation sequence. The first impregnation was followed by drying at 70 °C overnight and calcination at 350 °C in Ar for 1 h, and the second impregnation was followed only by drying at 70 °C overnight. In the second step, these samples were heated in a quartz reactor under a flow of Ar (50 ml min<sup>-1</sup>). The temperature was increased linearly at a rate of 10 °C min<sup>-1</sup> from room temperature (RT) to 850 °C, followed by cooling to RT under Ar flow. Then, the products were taken out for further use.

#### 1.2 Sample characterization

X-ray diffraction (XRD) was conducted using an X-ray diffractometer (X'Pert Pro MPD) equipped with a Cu K $\alpha$  source. BET surface areas of the samples were

measured by a surface area analyzer (NOVA4200). TEM images were acquired using a transmission electron microscope (Philips Tecnal 10). Methane temperature-programmed surface reaction (CH<sub>4</sub>-TPSR) study was performed using a flow of 6%CH<sub>4</sub>/Ar (50 ml min<sup>-1</sup>). Prior to the reaction, the sample was heated to 850 °C under Ar, followed by cooling to RT under Ar, and then was heated under the reactant gas from RT to 850 °C at a rate of 10 °C min<sup>-1</sup>. The evolution of gas-phase products during reaction was monitored using gas chromatography (GC).

### 1.3 Sample performance tests

Catalytic activities of Ni/Mo<sub>2</sub>C/CNTs catalysts for DRM were evaluated in a micro-reactor with an inner diameter of 10 mm at atmospheric pressure. Prior to the reaction, the sample was preheated with Ar at 850 °C for 30 min. Then CH<sub>4</sub> and CO<sub>2</sub> mixture with a molar ratio of 1:1 was allowed to pass through the catalyst (60-80 mesh) at a flow rate of 40 ml min<sup>-1</sup> (GHSV=60000 cm<sup>3</sup> g<sup>-1</sup> h<sup>-1</sup>). The exit gas stream from the reactor passed through a cold trap to remove water. The flow rates were measured with a soap bubble flow meter. The gas-phase products were analyzed by on-line gas chromatography (GC) equipped with a thermal conductivity detector and a TDX-01 (60-80 mesh) packed column (300 mm×2 mm i.d.). The external standard method was used to quantitative analysis. Linear relationship was obtained between values of peak area and volume concentration of gases in the range of 0.1-100 vol.%. The molar fraction for the products and reactants was determined on the basis of peak area-volume concentration curve and taken into account in the calculation of the conversion and product distribution. The conversions of CH<sub>4</sub> and CO<sub>2</sub>, and selectivity

of H<sub>2</sub> were defined respectively as follows: CH<sub>4</sub> conversion (%)= (moles of CH<sub>4</sub> converted)/(moles of CH<sub>4</sub> introduced); CO<sub>2</sub> conversion (%)= (moles of CO<sub>2</sub> converted)/(moles of CO<sub>2</sub> introduced); H<sub>2</sub> selectivity (%)= (moles of H<sub>2</sub> produced)/(2× moles of CH<sub>4</sub> converted). When the test was over, the used sample was cooled to RT under Ar flow. Then, the used samples were taken out for further characterization.

## 2. Results

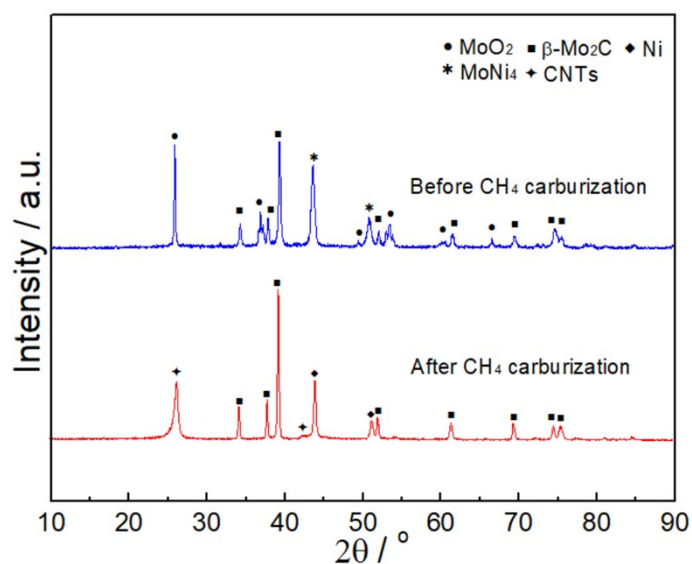

Fig. S1 XRD patterns of the sample contained MoNi<sub>4</sub> phase before and after CH<sub>4</sub> carburization.

Table S1 Comparison of DRM catalytic activity and stability for as-prepared and literature

reported Ni/Mo<sub>2</sub>C catalysts.

| Catalyst                                            | Ni:Mo<br>ratio | Temperature<br>(°C) | GHSV<br>(cm <sup>3</sup> g <sup>-1</sup> h <sup>-1</sup> ) | CH <sub>4</sub> conversion<br>rate <sup>b</sup> (mol g <sup>-1</sup> h <sup>-1</sup> ) | Catalytic<br>stability (h) | Ref.      |
|-----------------------------------------------------|----------------|---------------------|------------------------------------------------------------|----------------------------------------------------------------------------------------|----------------------------|-----------|
| Ni/Mo <sub>2</sub> C/CNTs                           | 1:1            | 850                 | 60000                                                      | 0.96                                                                                   | 36                         | This work |
| Ni/Mo <sub>2</sub> C/CNTs                           | 1:2            | 850                 | 60000                                                      | 0.98                                                                                   | 22                         | This work |
| Ni/Mo <sub>2</sub> C                                | 1:2            | 850                 | 18000                                                      | 0.32                                                                                   | 13                         | 19        |
| Ni/Mo <sub>2</sub> C                                | 1:5            | 850                 | 3800 <sup>a</sup>                                          | 0.07                                                                                   | 2                          | 22        |
| Ni/Mo <sub>2</sub> C                                | 1:2            | 800                 | 12000                                                      | 0.22                                                                                   | 23                         | 27        |
| Ni/Mo <sub>2</sub> C                                | 1:1            | 800                 | 12000                                                      | 0.21                                                                                   | 4                          | 27        |
| Ni/Mo <sub>2</sub> C/La <sub>2</sub> O <sub>3</sub> | 1:2            | 800                 | 12000                                                      | 0.13                                                                                   | 50                         | 30        |
| Ni/Mo <sub>2</sub> C/Al <sub>2</sub> O <sub>3</sub> | 1.6:1          | 700                 | 20000 <sup>a</sup>                                         | 0.04                                                                                   | 5                          | 7         |
| Ni/Mo <sub>2</sub> C/SBA-15                         | 1:4            | 800                 | 8000                                                       | 0.17                                                                                   | 180                        | 24        |

<sup>a</sup> Unit is h<sup>-1</sup>

<sup>b</sup> Calculated by the CH<sub>4</sub> conversion at the reaction time of 1 h.
